# Supplementary material for: Genomic and transcriptomic characterization of skull base chordoma
Source: PubMed Central journal article supplement (PMC5352057; doi:10.18632/oncotarget.13616), 2016-11-25
Supplement: oncotarget-08-1321-s001.pdf [file oncotarget-08-1321-s001.pdf]

## Genomic and transcriptomic characterization of skull base chordoma

### SUPPLEMENTARY FIGURE

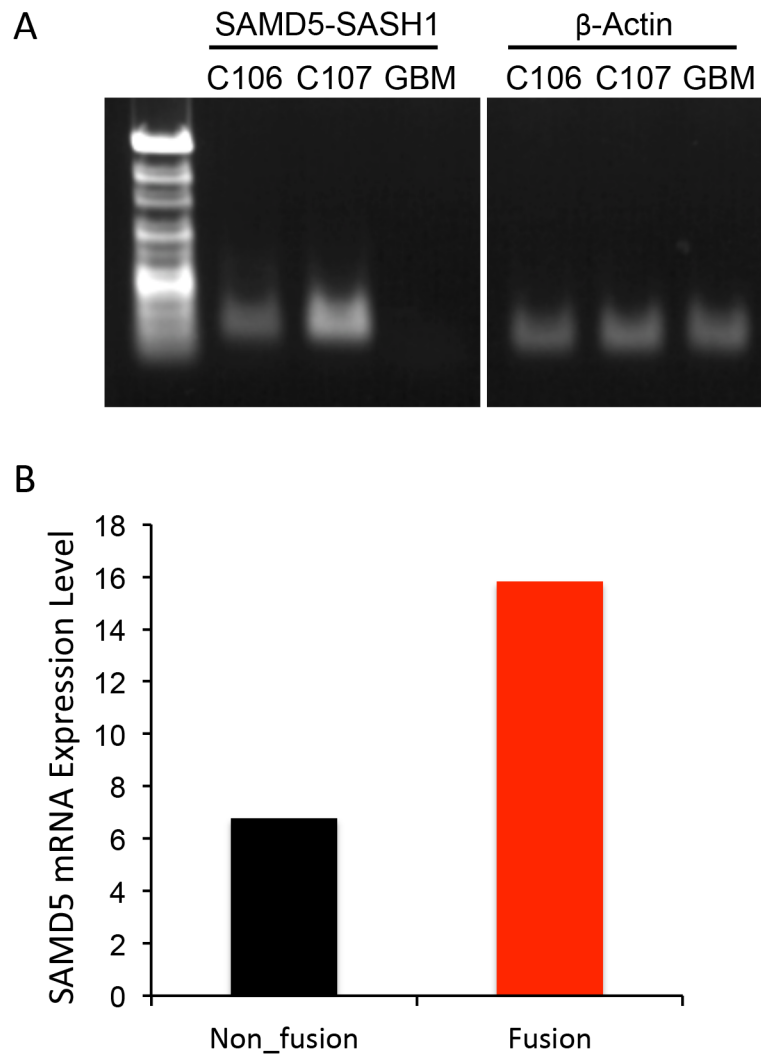

**Supplementary Figure S1: qRT-PCR of SAM D5-SASH1 fusion and SAM D5 mRNA expression level.** **A.** *SAM D5-SASH1*-specific PCR from cDNA derived from skull base chordoma harboring *SAM D5-SASH1* fusion. GBM was used as a control for comparison. **B.** Relative mRNA expression of *SAM D5* gene in *SAM D5-SASH1* fusion harboring samples vs. non-harboring sample.
